# Supplementary material for: Trust Me, I’m a Doctor: Examining Changes in How Privacy Concerns Affect Patient Withholding Behavior
Source: PubMed Central journal article supplement (PMC5244032; doi:10.2196/jmir.6296), 2017-01-04
Supplement: jmir_v19i1e2_app1.pdf [file jmir_v19i1e2_app1.pdf]

**Multimedia Appendix 1:** Average marginal effects of patient attitudes and demographic variables that are associated with withholding behavior, at 2011 and 2014, based on a fully interacted model with a pooled cross-section (n=4,393).<sup>a</sup>

| Variable                                       | 2011 OR (95% CI) | 2014 OR (95% CI) |
|------------------------------------------------|------------------|------------------|
| <b>Electronic Info Safe</b>                    |                  |                  |
| Not at All                                     | Ref.             | Ref.             |
| At least Somewhat Concerned                    | 4.21%            | 5.60%            |
| <b>Faxed Info Safe</b>                         |                  |                  |
| Not at All                                     | Ref.             | Ref.             |
| At least Somewhat Concerned                    | 12.62%***        | 10.03%***        |
| <b>Confident Info Safe</b>                     |                  |                  |
| Not at All Confident                           | Ref.             | Ref.             |
| At least Somewhat Confident                    | -3.04%           | 4.05%            |
| <b>Control Info</b>                            |                  |                  |
| Not at All Confident                           | Ref.             | Ref.             |
| At least Somewhat Confident                    | 4.60%            | 0.98%            |
| <b>Quality of Care</b>                         | -3.00%**         | -5.07%***        |
| <b>Important that Providers Share EMR Data</b> |                  |                  |
| Not at all                                     | Ref.             | Ref.             |
| Somewhat                                       | -2.81%           | -6.21%           |
| Very                                           | -5.56%           | -3.77%           |
| <b>Important that you Have Access to PHR</b>   |                  |                  |
| Not at All                                     | Ref.             | Ref.             |
| Somewhat                                       | -12.39%          | 2.21%            |
| Very                                           | -8.71%           | 5.39%            |
| <b>Provider has an EMR</b>                     | 3.28%            | -3.85%           |
| <b>Sex</b>                                     |                  |                  |
| Female                                         | Ref.             | Ref.             |
| Male                                           | -1.58%           | 0.95%            |
| <b>Race</b>                                    |                  |                  |
| White                                          | Ref.             | Ref.             |
| Black                                          | 4.84%            | -0.19%           |
| Latino                                         | 1.73%            | 3.34%            |
| Other                                          | 8.98%            | 7.84%            |
| <b>Education</b>                               |                  |                  |
| Less than High school                          | Ref.             | Ref.             |
| High School                                    | -4.76%           | 1.52%            |
| Some College                                   | 1.35%            | -0.99%           |

|                                               |         |          |
|-----------------------------------------------|---------|----------|
| College                                       | -2.03%  | -1.45%   |
| Graduate                                      | 1.69%   | 3.99%    |
| <b>Age</b>                                    |         |          |
| 18-35                                         | Ref.    | Ref.     |
| 35-49                                         | 4.64%   | 0.39%    |
| 50-64                                         | 0.91%   | -4.65%   |
| 65-74                                         | -1.16%  | -5.16%   |
| 75+                                           | -3.06%  | -10.51%* |
| <b>Employed</b>                               | 5.20%*  | 4.19%    |
| <b>Income</b>                                 |         |          |
| <\$20,000                                     | Ref.    | Ref.     |
| \$20,000 – 34,999                             | -2.88%  | -0.31%   |
| \$35,000 – 49,999                             | -5.50%  | -0.06%   |
| \$50,000 – 74,999                             | -2.77%  | -1.83%   |
| >\$75,000                                     | -5.82%  | -3.82%   |
| <b>Married</b>                                | -2.23%  | -3.34%   |
| <b>Rural</b>                                  | 0.02%   | 1.68%    |
| <b>US Immigrant</b>                           | 0.13%   | -3.03%   |
| <b>Homeowner</b>                              | 1.79%   | -3.58%   |
| <b>Health Insurance</b>                       | 2.59%   | -0.56%   |
| <b>General Health</b>                         |         |          |
| Poor                                          | Ref.    | Ref.     |
| Fair                                          | 1.67%   | -11.80%  |
| Good                                          | 3.05%   | -15.42%  |
| Very Good                                     | 6.38%   | -11.70%  |
| Excellent                                     | 6.55%   | -9.83%   |
| <b>Depression</b>                             |         |          |
| None                                          | Ref.    | Ref.     |
| Mild                                          | 1.24%   | -1.38%   |
| Moderate                                      | 11.50%* | 7.21%    |
| Severe                                        | 1.07%   | 1.25%    |
| <b>Non-Emergency Room Visits in Past Year</b> |         |          |
| 1                                             | Ref.    | Ref.     |
| 2-4                                           | -0.88%  | 0.56%    |
| 5-9                                           | 0.75%   | 0.19%    |
| ≥10                                           | 0.95%   | 5.58%    |
| <b>Have a Regular Provider</b>                | -0.20%  | 5.32%    |
| <b>Mean Self Care Efficacy</b>                | -0.24%  | -0.36%   |

**Notes:** \*\*\* $P < .001$ ; \*\*  $P < .01$ ; \*  $P < .05$ ; OR = Odds Ratio; CI = Confidence Interval.<sup>a</sup>Model adjusted for survey weights.
